# Supplementary material for: Targeted metabolomics of CSF in healthy individuals and patients with secondary progressive multiple sclerosis using high-resolution mass spectrometry
Source: PubMed Central journal article supplement (PMC7015966; doi:10.1007/s11306-020-1648-5), 2020-02-12
Supplement: 11306_2020_1648_MOESM1_ESM.pdf [file 11306_2020_1648_MOESM1_ESM.pdf]

## **Supplementary information:**

### **Targeted metabolomics of CSF in healthy individuals and patients with secondary progressive multiple sclerosis using high-resolution mass spectrometry**

Henrik Carlsson<sup>1</sup>, Sandy Abujrais<sup>1</sup>, Stephanie Herman<sup>1</sup>, Payam Emami Khoonsari<sup>1</sup>, Anders Svenningsson<sup>2</sup>, Joachim Burman<sup>3</sup>, Kim Kulima<sup>1</sup>

- 1) Department of Medical Sciences, Clinical Chemistry, Uppsala University, Uppsala, Sweden
- 2) Department of Clinical Sciences, Danderyd Hospital, Karolinska Institutet, Stockholm, Sweden
- 3) Department of Neuroscience, Uppsala University, Uppsala, Sweden

## **Contents of supporting information:**

**Table S1:** The mean concentration ( $\mu\text{M}$ ), standard deviation and concentration range of metabolites in CSF that were relatively quantified in the cohort of 12 SPMS patients and 12 controls.

**Table S1.** The mean concentration ( $\mu\text{M}$ ), standard deviation and concentration range of metabolites in CSF that were relatively quantified in the cohort of 12 SPMS patients and 12 controls.

| <b>Metabolite</b> | <b>Class</b>         | <b>Mean (<math>\pm</math>SD) conc. (<math>\mu\text{M}</math>)</b> | <b>Min-max conc. (<math>\mu\text{M}</math>)</b> | <b>n</b> |
|-------------------|----------------------|-------------------------------------------------------------------|-------------------------------------------------|----------|
| AC(4:0-OH)        | acylcarnitines       | 0.148( $\pm$ 0.02)                                                | 0.134-0.163                                     | 2        |
| AC(4:1)           | acylcarnitines       | 0.046( $\pm$ 0)                                                   | 0.046-0.046                                     | 1        |
| AC(4:1-DC)        | acylcarnitines       | 0.008( $\pm$ 0.004)                                               | 0.003-0.014                                     | 8        |
| AC(5:1)           | acylcarnitines       | 0.091( $\pm$ 0.016)                                               | 0.073-0.101                                     | 3        |
| AC(5:1-DC)        | acylcarnitines       | 0.026( $\pm$ 0.005)                                               | 0.022-0.029                                     | 2        |
| AC(7:0)           | acylcarnitines       | 0.162( $\pm$ 0)                                                   | 0.162-0.162                                     | 1        |
| AC(7:0-DC)        | acylcarnitines       | 0.131( $\pm$ 0.056)                                               | 0.07-0.181                                      | 4        |
| AC(8:1)           | acylcarnitines       | 0.086( $\pm$ 0.015)                                               | 0.064-0.114                                     | 8        |
| AC(10:2)          | acylcarnitines       | 0.011( $\pm$ 0)                                                   | 0.011-0.011                                     | 1        |
| AC(10:3)          | acylcarnitines       | 0.015( $\pm$ 0.003)                                               | 0.013-0.019                                     | 4        |
| AC(12:1)          | acylcarnitines       | 0.13( $\pm$ 0.147)                                                | 0.045-0.299                                     | 3        |
| AC(14:1-OH)       | acylcarnitines       | 0.106( $\pm$ 0.014)                                               | 0.091-0.135                                     | 8        |
| AC(14:2)          | acylcarnitines       | 0.002( $\pm$ 0)                                                   | 0.002-0.002                                     | 2        |
| AC(19:0)          | acylcarnitines       | 0.04( $\pm$ 0)                                                    | 0.04-0.04                                       | 1        |
| PC(32:0)          | glycerophospholipids | 0.261( $\pm$ 0.061)                                               | 0.173-0.397                                     | 24       |
| PC(34:1)          | glycerophospholipids | 1.77( $\pm$ 0.462)                                                | 1.06-2.8                                        | 24       |

|             |                      |               |             |    |
|-------------|----------------------|---------------|-------------|----|
| PC(34:2)    | glycerophospholipids | 0.231(±0.163) | 0.133-0.959 | 24 |
| SM(34:1)    | sphingolipids        | 0.336(±0.108) | 0.182-0.624 | 24 |
| CE(18:2)    | cholesterol esters   | 9.24(±10)     | 0.238-34.7  | 24 |
| LPC(16:0)   | glycerophospholipids | 0.15(±0.239)  | 0.027-0.737 | 8  |
| LPC(18:0)   | glycerophospholipids | 0.044(±0.018) | 0.03-0.063  | 3  |
| LPC(18:1)   | glycerophospholipids | 1.28(±0.778)  | 0.728-2.43  | 4  |
| LPC(20:1)   | glycerophospholipids | 0.135(±0)     | 0.135-0.135 | 1  |
| LPC-O(17:1) | glycerophospholipids | 0.175(±0)     | 0.175-0.175 | 1  |
| PC(25:0)    | glycerophospholipids | 0.198(±0.068) | 0.094-0.335 | 14 |
| PC(29:0)    | glycerophospholipids | 0.248(±0.013) | 0.231-0.26  | 4  |
| PC(29:1)    | glycerophospholipids | 0.106(±0.111) | 0.018-0.389 | 11 |
| TG(52:4)    | Glycerides           | 0.149(±0.103) | 0.05-0.587  | 24 |
| PC(30:3)    | glycerophospholipids | 0.492(±0)     | 0.492-0.492 | 1  |
| PC(31:0)    | glycerophospholipids | 0.077(±0)     | 0.077-0.077 | 1  |
| PC(31:1)    | glycerophospholipids | 0.123(±0.094) | 0.037-0.223 | 3  |
| PC(31:2)    | glycerophospholipids | 0.009(±0)     | 0.008-0.009 | 2  |
| AC(14:1)    | Acylcarnitines       | 0.069(±0.03)  | 0.023-0.131 | 23 |
| PC(32:1)    | glycerophospholipids | 0.221(±0.003) | 0.219-0.225 | 3  |
| PC(32:2)    | glycerophospholipids | 0.142(±0)     | 0.142-0.142 | 1  |
| PC(32:3)    | glycerophospholipids | 0.086(±0)     | 0.086-0.086 | 1  |

|            |                      |                     |             |    |
|------------|----------------------|---------------------|-------------|----|
| PC(33:2)   | glycerophospholipids | 0.02( $\pm$ 0)      | 0.02-0.02   | 1  |
| PC(34:3)   | glycerophospholipids | 0.084( $\pm$ 0.025) | 0.04-0.113  | 6  |
| PC(34:5)   | glycerophospholipids | 2.12( $\pm$ 0.459)  | 1.5-2.77    | 8  |
| PC(35:0)   | glycerophospholipids | 0.134( $\pm$ 0.052) | 0.087-0.234 | 8  |
| PC(35:2)   | glycerophospholipids | 0.052( $\pm$ 0.007) | 0.045-0.059 | 3  |
| PC(36:1)   | glycerophospholipids | 0.202( $\pm$ 0.06)  | 0.13-0.329  | 12 |
| PC-O(34:0) | glycerophospholipids | 0.097( $\pm$ 0.031) | 0.035-0.163 | 23 |
| PC(36:4)   | glycerophospholipids | 0.202( $\pm$ 0.048) | 0.168-0.288 | 5  |
| PC(36:6)   | glycerophospholipids | 0.034( $\pm$ 0.021) | 0.012-0.078 | 8  |
| PC(37:1)   | glycerophospholipids | 0.358( $\pm$ 0.008) | 0.349-0.365 | 3  |
| PC(38:1)   | glycerophospholipids | 10.9( $\pm$ 0.081)  | 10.8-10.9   | 2  |
| PC(38:5)   | glycerophospholipids | 0.083( $\pm$ 0.044) | 0.044-0.174 | 10 |
| PC(38:6)   | glycerophospholipids | 0.102( $\pm$ 0.089) | 0.045-0.204 | 3  |
| PC(38:7)   | glycerophospholipids | 0.051( $\pm$ 0.009) | 0.044-0.057 | 2  |
| PC(40:1)   | glycerophospholipids | 0.083( $\pm$ 0.008) | 0.077-0.092 | 3  |
| PC(40:2)   | glycerophospholipids | 0.048( $\pm$ 0.028) | 0.018-0.111 | 13 |
| PC(40:4)   | glycerophospholipids | 0.083( $\pm$ 0.02)  | 0.05-0.116  | 11 |
| PC(44:5)   | glycerophospholipids | 0.162( $\pm$ 0.066) | 0.081-0.373 | 21 |
| PC(40:7)   | glycerophospholipids | 0.069( $\pm$ 0.006) | 0.065-0.072 | 2  |
| PC(40:8)   | glycerophospholipids | 0.045( $\pm$ 0.009) | 0.036-0.057 | 5  |

|            |                      |               |             |    |
|------------|----------------------|---------------|-------------|----|
| PC(40:9)   | glycerophospholipids | 0.028(±0)     | 0.028-0.028 | 1  |
| PC(41:5)   | glycerophospholipids | 0.089(±0.027) | 0.06-0.112  | 3  |
| PC(41:8)   | glycerophospholipids | 0.031(±0.012) | 0.017-0.053 | 8  |
| PC(42:2)   | glycerophospholipids | 0.015(±0)     | 0.015-0.015 | 1  |
| PC(42:5)   | glycerophospholipids | 0.067(±0.021) | 0.041-0.096 | 6  |
| PC(42:6)   | glycerophospholipids | 0.02(±0)      | 0.02-0.02   | 1  |
| PC(42:7)   | glycerophospholipids | 0.072(±0.029) | 0.052-0.093 | 2  |
| PC(42:10)  | glycerophospholipids | 0.032(±0.006) | 0.027-0.036 | 2  |
| PC(43:2)   | glycerophospholipids | 0.219(±0)     | 0.219-0.219 | 1  |
| PC-O(36:2) | glycerophospholipids | 0.186(±0.059) | 0.105-0.315 | 21 |
| PC(44:10)  | glycerophospholipids | 0.078(±0.041) | 0.041-0.136 | 9  |
| PC(44:12)  | glycerophospholipids | 0.128(±0.042) | 0.101-0.176 | 3  |
| PC(46:2)   | glycerophospholipids | 0.16(±0.086)  | 0.088-0.255 | 3  |
| PC-O(30:0) | glycerophospholipids | 0.085(±0.085) | 0.013-0.242 | 10 |
| PC-O(30:2) | glycerophospholipids | 0.059(±0.088) | 0.008-0.216 | 5  |
| PC-O(31:0) | glycerophospholipids | 0.161(±0.03)  | 0.131-0.198 | 5  |
| AC(4:0-DC) | Acylcarnitines       | 0.027(±0.016) | 0.01-0.068  | 20 |
| PC-O(32:0) | glycerophospholipids | 0.03(±0)      | 0.03-0.03   | 1  |
| PC-O(33:1) | glycerophospholipids | 0.595(±0.121) | 0.384-0.752 | 12 |
| PC-O(33:3) | glycerophospholipids | 0.024(±0.018) | 0.011-0.055 | 5  |

|            |                      |                     |             |    |
|------------|----------------------|---------------------|-------------|----|
| PC(40:3)   | glycerophospholipids | 0.053( $\pm$ 0.02)  | 0.027-0.097 | 20 |
| PC-O(34:2) | glycerophospholipids | 0.043( $\pm$ 0.03)  | 0.017-0.138 | 15 |
| PC-O(34:3) | glycerophospholipids | 0.012( $\pm$ 0.001) | 0.01-0.014  | 6  |
| PC-O(36:0) | glycerophospholipids | 0.07( $\pm$ 0.008)  | 0.064-0.076 | 2  |
| PC-O(36:1) | glycerophospholipids | 0.117( $\pm$ 0.068) | 0.045-0.281 | 12 |
| PC-O(31:1) | glycerophospholipids | 0.415( $\pm$ 0.231) | 0.036-0.73  | 20 |
| PC-O(36:3) | glycerophospholipids | 0.321( $\pm$ 0.07)  | 0.2-0.388   | 6  |
| PC-O(36:6) | glycerophospholipids | 0.021( $\pm$ 0.012) | 0.011-0.036 | 4  |
| PC-O(38:0) | glycerophospholipids | 0.112( $\pm$ 0.026) | 0.09-0.159  | 6  |
| PC-O(38:1) | glycerophospholipids | 0.219( $\pm$ 0.069) | 0.125-0.293 | 5  |
| PC-O(38:2) | glycerophospholipids | 0.102( $\pm$ 0.029) | 0.065-0.178 | 12 |
| PC-O(38:6) | glycerophospholipids | 0.051( $\pm$ 0.033) | 0.028-0.074 | 2  |
| PC-O(40:0) | glycerophospholipids | 0.043( $\pm$ 0.014) | 0.033-0.06  | 3  |
| PC-O(40:2) | glycerophospholipids | 0.12( $\pm$ 0.034)  | 0.075-0.166 | 12 |
| PC-O(40:3) | glycerophospholipids | 0.122( $\pm$ 0.029) | 0.089-0.144 | 3  |
| PC-O(42:0) | glycerophospholipids | 0.058( $\pm$ 0.014) | 0.047-0.082 | 5  |
| PC-O(42:1) | glycerophospholipids | 0.078( $\pm$ 0.013) | 0.068-0.087 | 2  |
| PC-O(42:2) | glycerophospholipids | 0.059( $\pm$ 0.025) | 0.034-0.101 | 6  |
| PC-O(42:4) | glycerophospholipids | 0.052( $\pm$ 0.007) | 0.042-0.06  | 5  |
| PC-O(42:5) | glycerophospholipids | 0.086( $\pm$ 0.045) | 0.06-0.154  | 4  |

|            |                      |               |             |    |
|------------|----------------------|---------------|-------------|----|
| PC-O(44:4) | glycerophospholipids | 0.085(±0)     | 0.085-0.085 | 1  |
| Cer(34:0)  | sphingolipids        | 0.101(±0.058) | 0.06-0.167  | 3  |
| Cer(38:1)  | sphingolipids        | 0.346(±0.244) | 0.107-0.635 | 5  |
| Cer(41:1)  | sphingolipids        | 0.247(±0.034) | 0.223-0.271 | 2  |
| Cer(43:1)  | sphingolipids        | 0.109(±0.039) | 0.04-0.129  | 5  |
| Cer(44:0)  | sphingolipids        | 0.215(±0)     | 0.215-0.215 | 1  |
| SM(33:2)   | sphingolipids        | 0.159(±0.149) | 0.03-0.437  | 11 |
| TG(53:4)   | glycerides           | 0.138(±0.039) | 0.085-0.248 | 20 |
| SM(35:1)   | sphingolipids        | 0.204(±0)     | 0.204-0.204 | 1  |
| SM(36:1)   | sphingolipids        | 0.154(±0.124) | 0.053-0.448 | 9  |
| SM(36:2)   | sphingolipids        | 0.189(±0.164) | 0.024-0.447 | 5  |
| SM(40:1)   | sphingolipids        | 0.151(±0.088) | 0.018-0.261 | 7  |
| SM(40:4)   | sphingolipids        | 0.062(±0.016) | 0.042-0.082 | 8  |
| SM(41:1)   | sphingolipids        | 0.064(±0)     | 0.064-0.064 | 1  |
| SM(42:1)   | sphingolipids        | 0.307(±0)     | 0.307-0.307 | 1  |
| SM(42:2)   | sphingolipids        | 0.04(±0)      | 0.04-0.04   | 1  |
| SM(42:3)   | sphingolipids        | 0.158(±0.126) | 0.057-0.39  | 7  |
| SM(43:1)   | sphingolipids        | 0.494(±0)     | 0.494-0.494 | 1  |
| SM(44:1)   | sphingolipids        | 0.049(±0)     | 0.049-0.049 | 1  |
| PC(36:2)   | glycerophospholipids | 0.248(±0.092) | 0.177-0.599 | 19 |
| CE(16:1)   | cholesterol esters   | 0.977(±0.768) | 0.311-1.64  | 4  |

|            |                      |                     |             |    |
|------------|----------------------|---------------------|-------------|----|
| CE(17:0)   | cholesterol esters   | 2.82( $\pm$ 0.898)  | 1.8-3.51    | 3  |
| PC(40:6)   | glycerophospholipids | 0.065( $\pm$ 0.024) | 0.04-0.129  | 19 |
| PC-O(33:0) | glycerophospholipids | 0.16( $\pm$ 0.081)  | 0.033-0.288 | 19 |
| CE(18:3)   | cholesterol esters   | 0.817( $\pm$ 0.54)  | 0.124-1.3   | 4  |
| CE(20:4)   | cholesterol esters   | 5.59( $\pm$ 3.46)   | 2.86-14.4   | 11 |
| CE(22:6)   | cholesterol esters   | 6.84( $\pm$ 1.53)   | 5.49-9.78   | 10 |
| DG(36:3)   | glycerides           | 0.368( $\pm$ 0.069) | 0.301-0.465 | 6  |
| DG(36:4)   | glycerides           | 0.02( $\pm$ 0.006)  | 0.016-0.024 | 2  |
| DG(39:0)   | glycerides           | 0.171( $\pm$ 0.11)  | 0.096-0.359 | 6  |
| DG(42:0)   | glycerides           | 0.159( $\pm$ 0)     | 0.159-0.159 | 1  |
| DG(44:3)   | glycerides           | 0.202( $\pm$ 0.116) | 0.062-0.478 | 15 |
| DG-O(34:1) | glycerides           | 0.572( $\pm$ 0)     | 0.572-0.572 | 1  |
| DG-O(36:4) | glycerides           | 0.591( $\pm$ 0.025) | 0.574-0.609 | 2  |
| TG(44:2)   | glycerides           | 0.453( $\pm$ 0.095) | 0.327-0.611 | 8  |
| TG(44:4)   | glycerides           | 0.012( $\pm$ 0)     | 0.012-0.012 | 1  |
| TG(48:2)   | glycerides           | 0.194( $\pm$ 0.049) | 0.11-0.275  | 19 |
| TG(48:3)   | glycerides           | 0.484( $\pm$ 0)     | 0.484-0.484 | 1  |
| TG(49:2)   | glycerides           | 0.24( $\pm$ 0.084)  | 0.167-0.339 | 4  |
| TG(50:2)   | glycerides           | 0.155( $\pm$ 0.065) | 0.081-0.305 | 16 |
| TG(50:3)   | glycerides           | 0.224( $\pm$ 0.071) | 0.174-0.274 | 2  |



|          |                      |               |             |    |
|----------|----------------------|---------------|-------------|----|
| TG(50:4) | glycerides           | 0.016(±0)     | 0.016-0.016 | 1  |
| TG(51:1) | glycerides           | 0.744(±0.079) | 0.653-0.791 | 3  |
| TG(51:2) | glycerides           | 0.07(±0)      | 0.07-0.07   | 1  |
| TG(51:3) | glycerides           | 0.115(±0.029) | 0.094-0.136 | 2  |
| TG(51:4) | glycerides           | 0.109(±0.06)  | 0.036-0.244 | 15 |
| TG(52:2) | glycerides           | 0.283(±0.161) | 0.116-0.563 | 8  |
| TG(52:3) | glycerides           | 0.416(±0.418) | 0.145-1.4   | 8  |
| CE(18:1) | cholesterol esters   | 1.98(±2.46)   | 0.21-9.07   | 18 |
| TG(52:5) | glycerides           | 0.149(±0)     | 0.149-0.149 | 1  |
| TG(52:6) | glycerides           | 0.251(±0)     | 0.251-0.251 | 1  |
| TG(53:3) | glycerides           | 0.074(±0)     | 0.074-0.074 | 1  |
| PC(30:0) | glycerophospholipids | 0.063(±0.026) | 0.023-0.111 | 17 |
| TG(53:6) | glycerides           | 0.153(±0)     | 0.153-0.153 | 1  |
| TG(54:3) | glycerides           | 0.337(±0.003) | 0.335-0.339 | 2  |
| TG(54:4) | glycerides           | 0.322(±0)     | 0.322-0.322 | 1  |
| TG(54:5) | glycerides           | 0.162(±0.137) | 0.078-0.366 | 4  |
| TG(54:6) | glycerides           | 0.129(±0.005) | 0.126-0.133 | 2  |
| TG(54:7) | glycerides           | 0.361(±0)     | 0.361-0.361 | 1  |
| TG(55:7) | glycerides           | 1.54(±1.13)   | 0.469-2.72  | 6  |
| TG(55:8) | glycerides           | 0.107(±0.064) | 0.043-0.224 | 8  |
| TG(56:6) | glycerides           | 0.136(±0)     | 0.136-0.136 | 1  |

|          |            |                     |             |   |
|----------|------------|---------------------|-------------|---|
| TG(56:7) | glycerides | 0.06( $\pm$ 0)      | 0.06-0.06   | 1 |
| TG(56:8) | glycerides | 0.365( $\pm$ 0.193) | 0.235-0.587 | 3 |
| TG(56:9) | glycerides | 0.858( $\pm$ 0.127) | 0.768-0.948 | 2 |

---
